# Supplementary material
Source: bioRxiv or medRxiv preprint supplement (http://medrxiv.stage.highwire.org/highwire/filestream/84097/field_highwire_adjunct_files/3/2020.05.29.20116525-4.pdf)
Supplement: Supplementary file [file 2020.05.29.20116525-4.pdf]

**E-TABLE 4: Socio-demographic risk factors for 13 to 17-year-olds self-reported occasional or frequent smoking of cigarettes, shishas or e-cigarettes (N=1527)**

|                              | Crude |          |        | Adjusted |          |        |
|------------------------------|-------|----------|--------|----------|----------|--------|
|                              | OR    | (95% CI) |        | aOR      | (95% CI) |        |
| Age, per year increase       | 2.0   | (1.7     | - 2.2) | 2.0      | (1.8     | - 2.3) |
| Sex, male                    | 1.9   | (1.5     | - 2.3) | 2.1      | (1.7     | - 2.6) |
| Socioeconomic position index | 0.9   | (0.8     | - 1.0) | 1.0      | (0.9     | - 1.1) |
| Urbanization degree          |       |          |        |          |          |        |
| Large urban area             | 1.4   | (1.2     | - 1.8) | 1.2      | (0.9     | - 1.6) |
| Small urban area             | ref.  |          |        | ref.     |          |        |
| Rural area                   | 1.4   | (0.9     | - 2.1) | 1.8      | (1.2     | - 2.9) |
| Paternal current smoking     | 1.6   | (1.3     | - 2.0) | 1.5      | (1.2     | - 1.9) |
| Maternal current smoking     | 1.9   | (1.5     | - 2.5) | 1.7      | (1.3     | - 2.3) |

OR: odds ratio. aOR: adjusted odds ratio. CI: confidence interval. The multivariable model includes all the variables in the table.
